# Supplementary material for: Structure and gelation mechanism of silk hydrogels
Source: Royal Society of Chemistry journal article supplement (doi:10.1039/b916319k), 2010-01-01
Supplement: b916319k.pdf [file b916319k.pdf]

Supplementary material

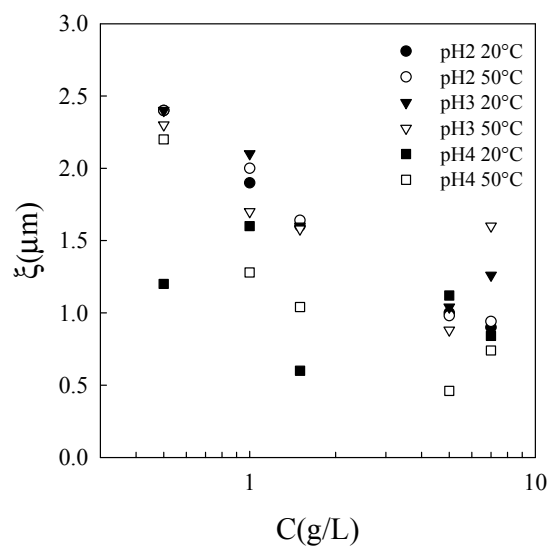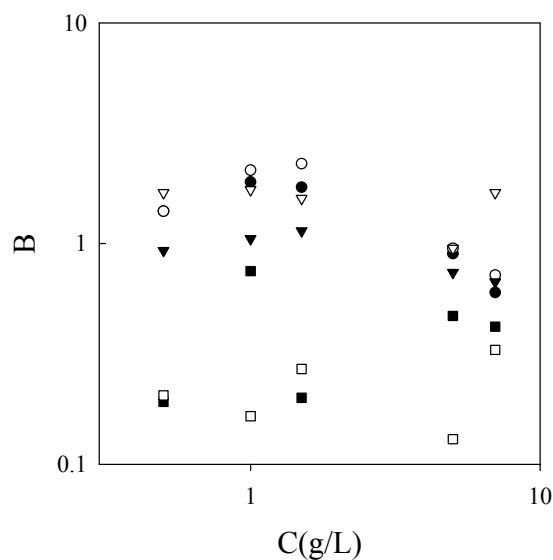

Top Concentration dependence of the correlation length of the concentration fluctuations for gels formed at different pH and T, indicated in the figure. Bottom Concentration dependence of the amplitude of the concentration fluctuations for gels formed at different pH and T. Symbols as in figure 7.
